# Supplementary material for: Phthalate content in toy samples available on the market of the Republic of Serbia
Source: Royal Society of Chemistry journal article supplement (doi:10.1039/d4ay01092b), 2024-01-01
Supplement: d4ay01092b1.pdf [file d4ay01092b1.pdf]

Figure captions:

**Figure S1.** Chromatogram of standard mixture of 6 phthalates obtained by method 1; BBP, butyl benzyl phthalate; DBP, di-n-butyl phthalate; DNOP, di-n-octyl phthalate; DEHP, di-2-ethylhexyl phthalate; DINP, diisononyl phthalate; DIDP, diisodecyl phthalate.

**Figure S2.** Chromatogram of standard mixture of 7 phthalates obtained by method 2; DBP, di-n-butyl phthalate; DIBP, diisobutyl phthalate; BBP, butyl benzyl phthalate; DNOP, di-n-octyl phthalate; DEHP, di-2-ethylhexyl phthalate; DINP, diisononyl phthalate; DIDP, diisodecyl phthalate.

**Figure S3.** Chromatogram of the blank sample, with labelled regions where phthalates are expected (used for LOD determination), obtained by method 1.

**Figure S4.** Chromatogram of the blank sample, with labelled regions where phthalates are expected (used for LOD determination), obtained by method 2.

**Figure S5.** Chromatogram of the sample from proficiency testing during 2021 obtained by method 1 (PT LGC 2021).

**Figure S6.** Chromatogram of the sample from proficiency testing during 2021 obtained by method 2 (PT LGC 2021).

**Figure S7.** Chromatogram of the sample from proficiency testing during 2016 obtained by method 1, diluted (PT CHECK 2016).

**Figure S8.** Chromatogram of the sample from proficiency testing during 2017 obtained by method 1, diluted (PT CHECK 2017).

**Figure S9a.** Chromatogram of the toy sample A that contains DBP, DEHP and DINP obtained by method 1.

**Figure S9b.** Chromatogram of the toy sample A that contains DBP, DEHP and DINP obtained by method 2.

**Figure S10.** Chromatogram of the toy sample B that contains DBP and DEHP obtained by method 1.

**Figure S11.** Chromatogram of the toy sample C that contains DBP, DEHP and trace of DIBP, obtained by method 2.
