# Supplementary material for: Phthalate content in toy samples available on the market of the Republic of Serbia
Source: Royal Society of Chemistry journal article supplement (doi:10.1039/d4ay01092b), 2024-01-01
Supplement: d4ay01092b14.pdf [file d4ay01092b14.pdf]

Table S1. Proficiency testing results of toys in laboratory performance assessment

| Analyte | PVC folium adopted – mean value (Check 2016) % (w/w) | Laboratory of Institute of Public Health of Serbia % (w/w) | Rubber material adopted – mean value (LGC 2017) % (w/w) | Laboratory of Institute of Public Health of Serbia % (w/w) | Combined material adopted – mean value (LGC 2021) % (w/w) | Laboratory of Institute of Public Health of Serbia % (w/w) |
|---------|------------------------------------------------------|------------------------------------------------------------|---------------------------------------------------------|------------------------------------------------------------|-----------------------------------------------------------|------------------------------------------------------------|
| BBP     | 18.80 ± 2.82                                         | 19.40                                                      | /                                                       | /                                                          | 0.15 ± 0.03                                               | 0.17                                                       |
| DBP     | 27.30 ± 4.10                                         | 27.30                                                      | /                                                       | /                                                          | 0.12 ± 0.03                                               | 0.14                                                       |
| DEHP    | 29.60 ± 4.44                                         | 29.50                                                      | /                                                       | /                                                          | 0.14 ± 0.03                                               | 0.13                                                       |
| DNOP    | 24.30 ± 3.64                                         | 21.10                                                      | /                                                       | /                                                          | 0.07 ± 0.02                                               | 0.06                                                       |
| DIBP    | /                                                    | /                                                          | /                                                       | /                                                          | 0.21 ± 0.03                                               | 0.23                                                       |
| DINP    | 33.50 ± 8.37                                         | 25.90                                                      | 22.74 ± 5.49                                            | 24.91                                                      | 0.19 ± 0.06                                               | 0.15                                                       |
| DIDP    | 15.20 ± 3.77                                         | 11.46                                                      | 2.65 ± 0.77                                             | 2.12                                                       | 0.24 ± 0.03                                               | 0.19                                                       |
