# Supplementary figures and images for: Phthalate content in toy samples available on the market of the Republic of Serbia
Source: Royal Society of Chemistry journal article supplement (doi:10.1039/d4ay01092b), 2024-01-01

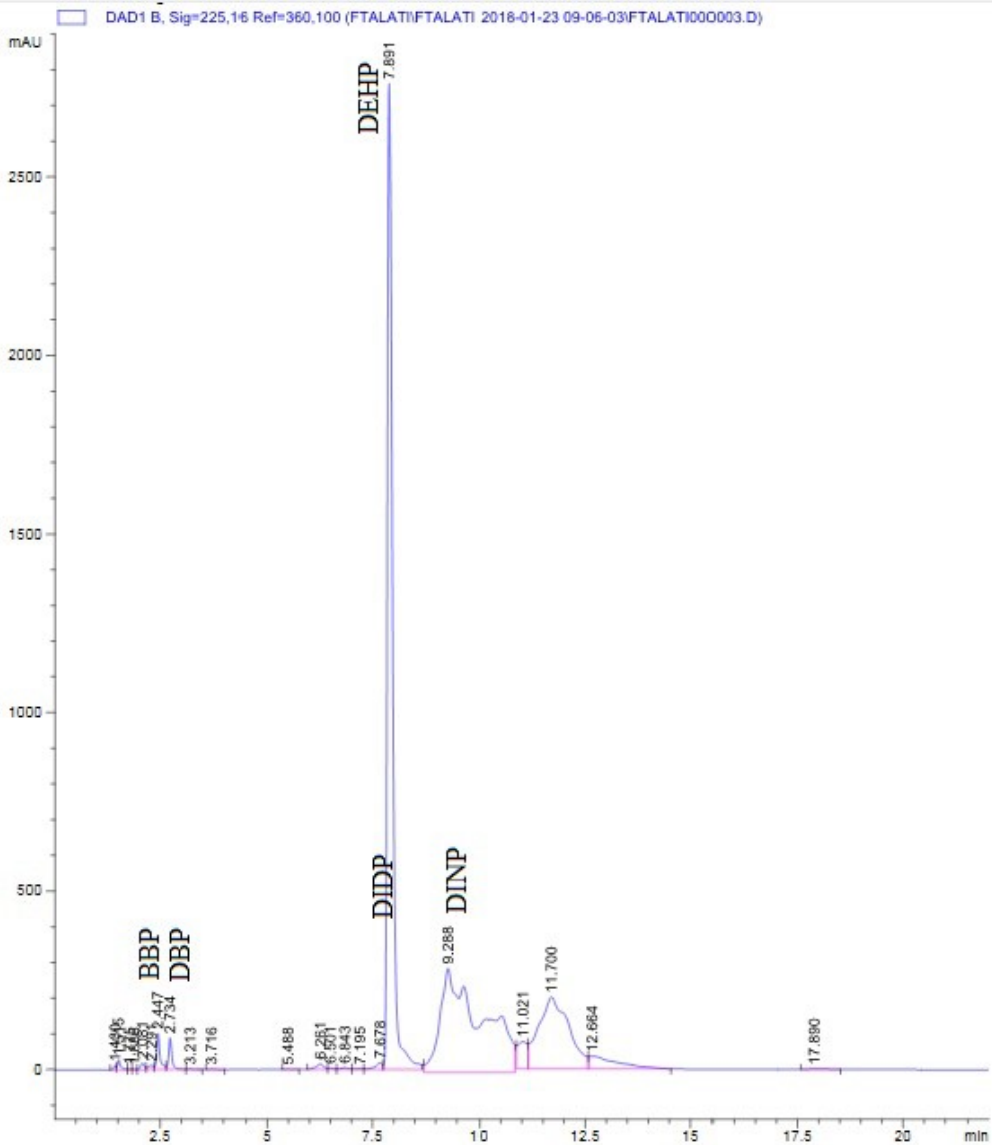

Supplement: d4ay01092b10.pdf [file d4ay01092b10.pdf]

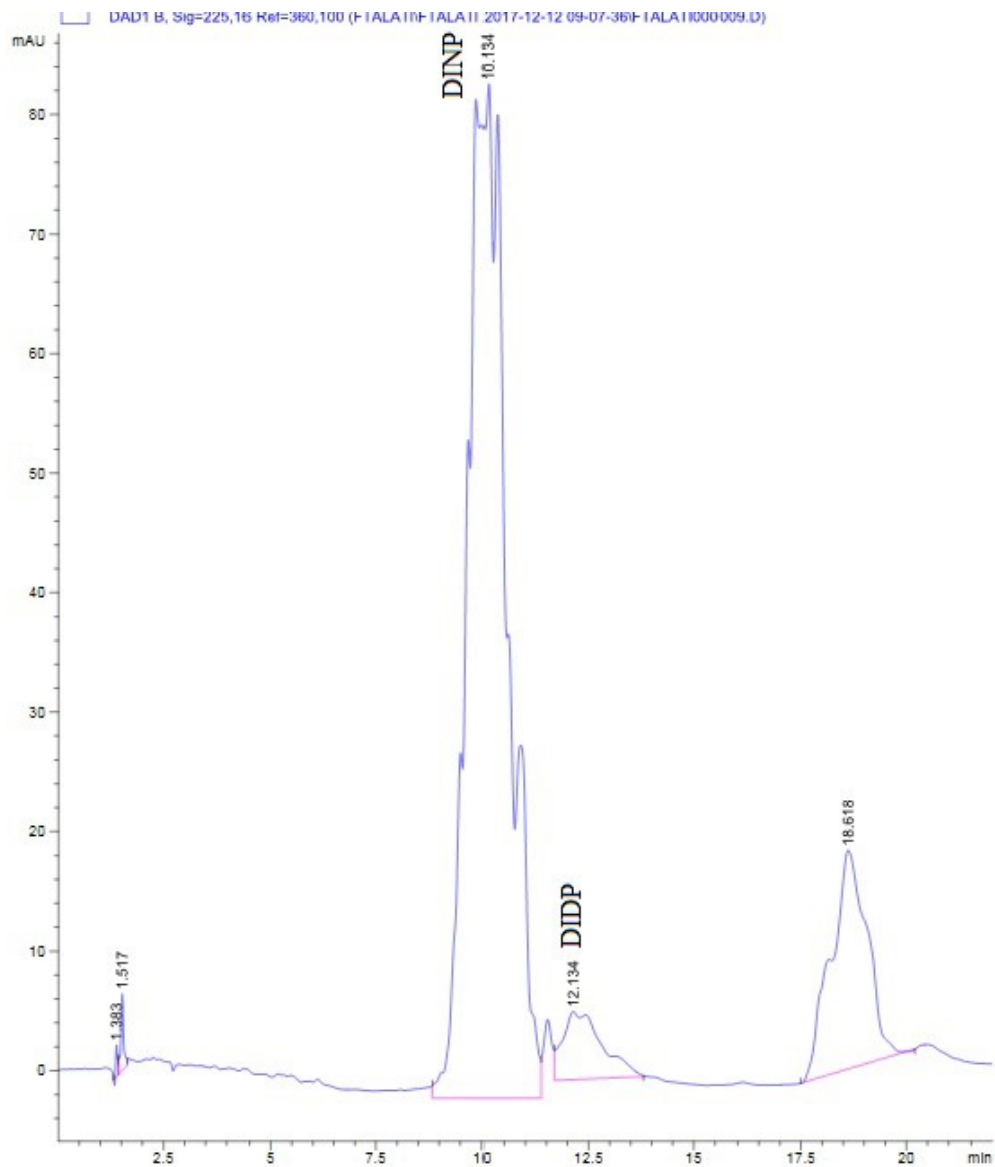

Supplement: d4ay01092b11.pdf [file d4ay01092b11.pdf]

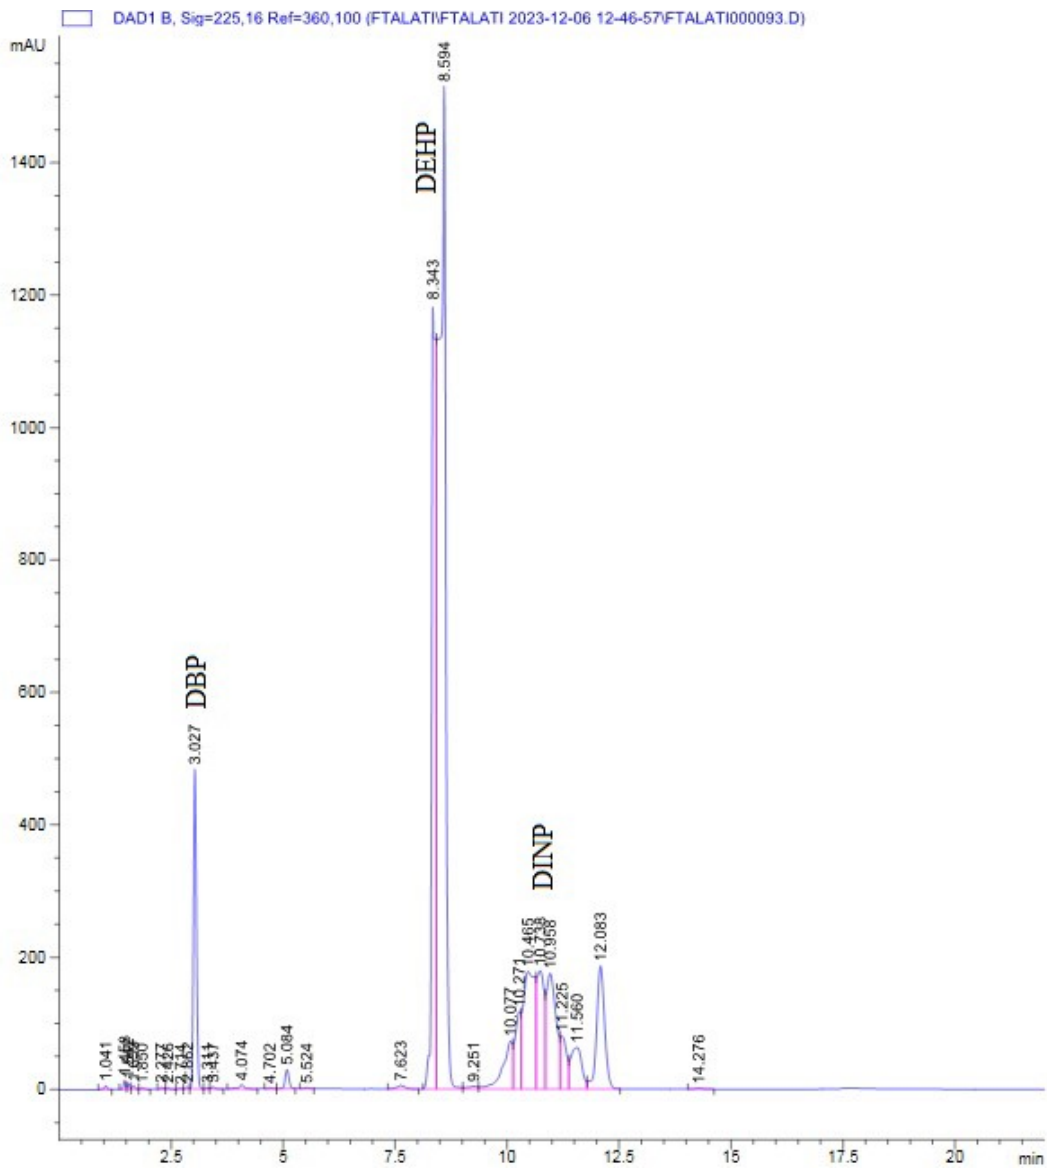

Supplement: d4ay01092b12.pdf [file d4ay01092b12.pdf]

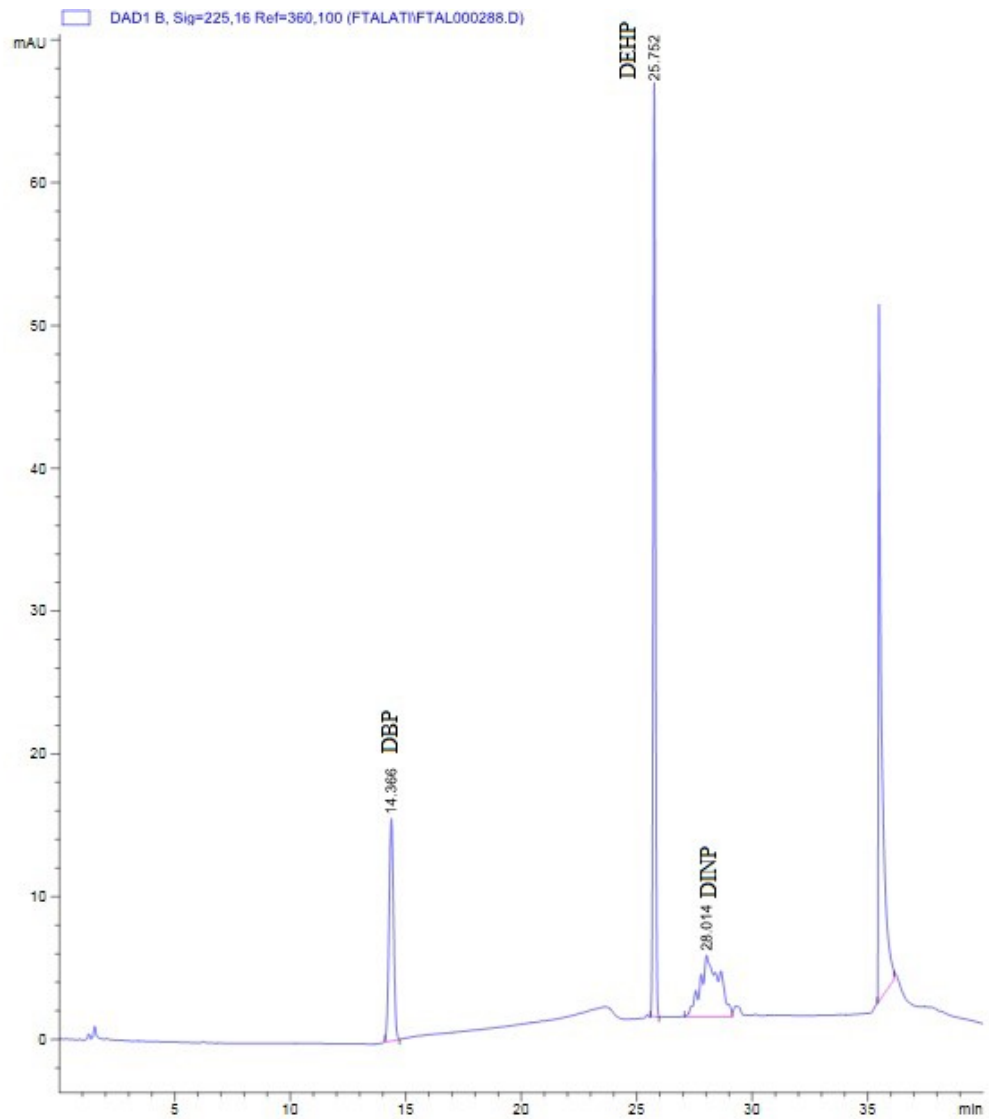

Supplement: d4ay01092b13.pdf [file d4ay01092b13.pdf]

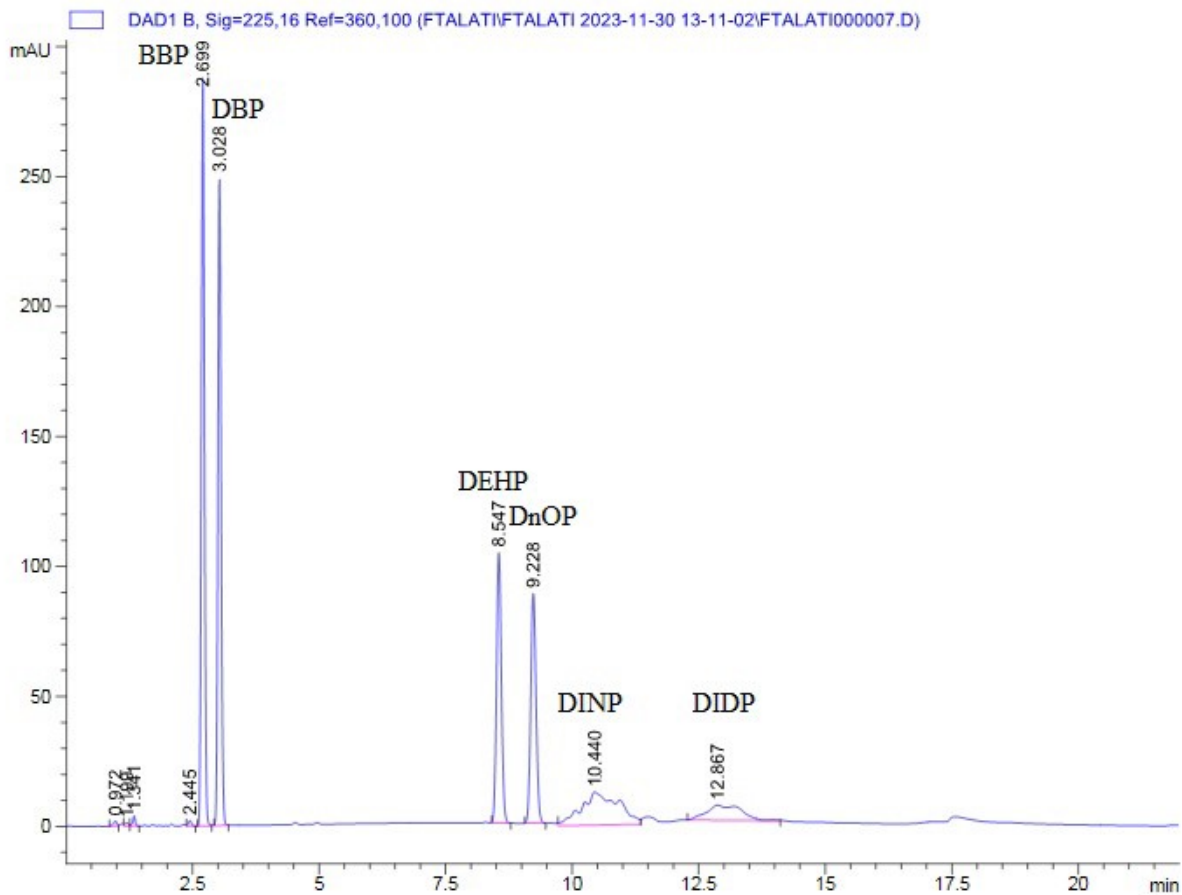

Supplement: d4ay01092b2.pdf [file d4ay01092b2.pdf]

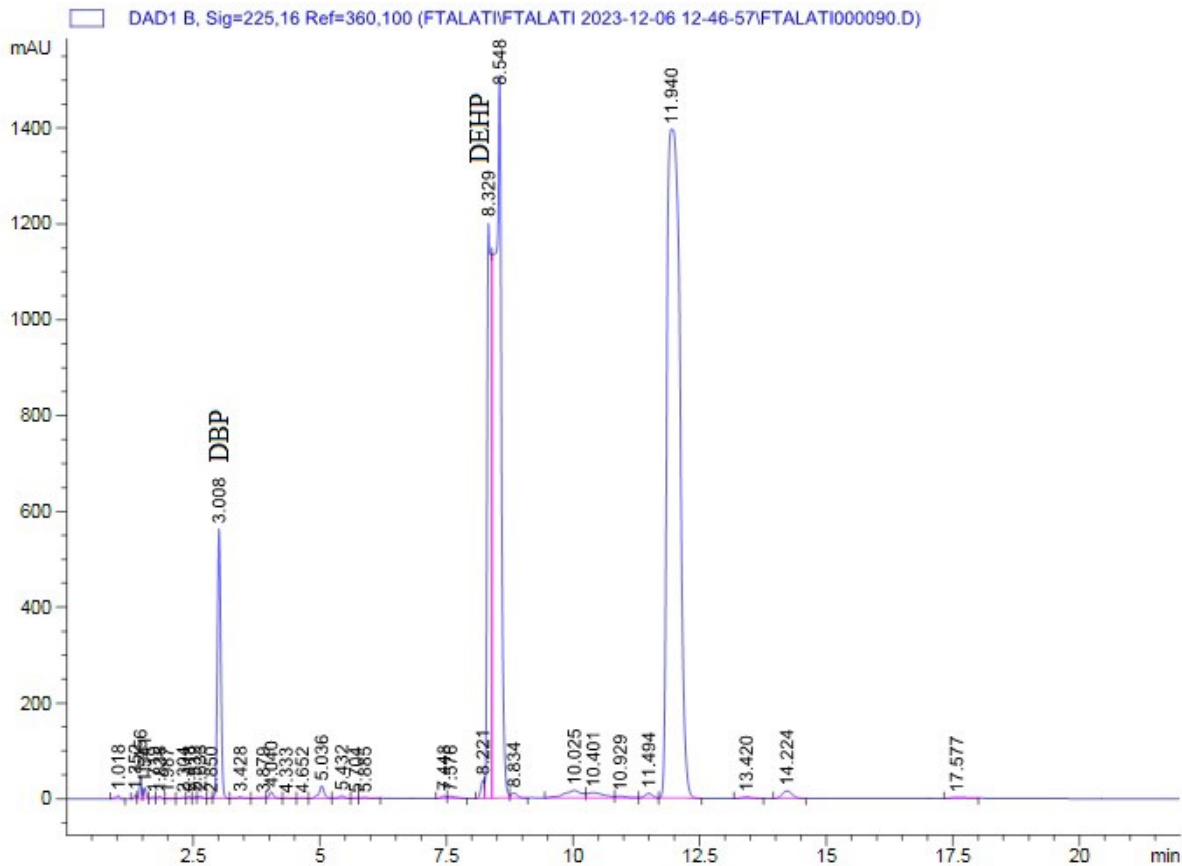

Supplement: d4ay01092b3.pdf [file d4ay01092b3.pdf]

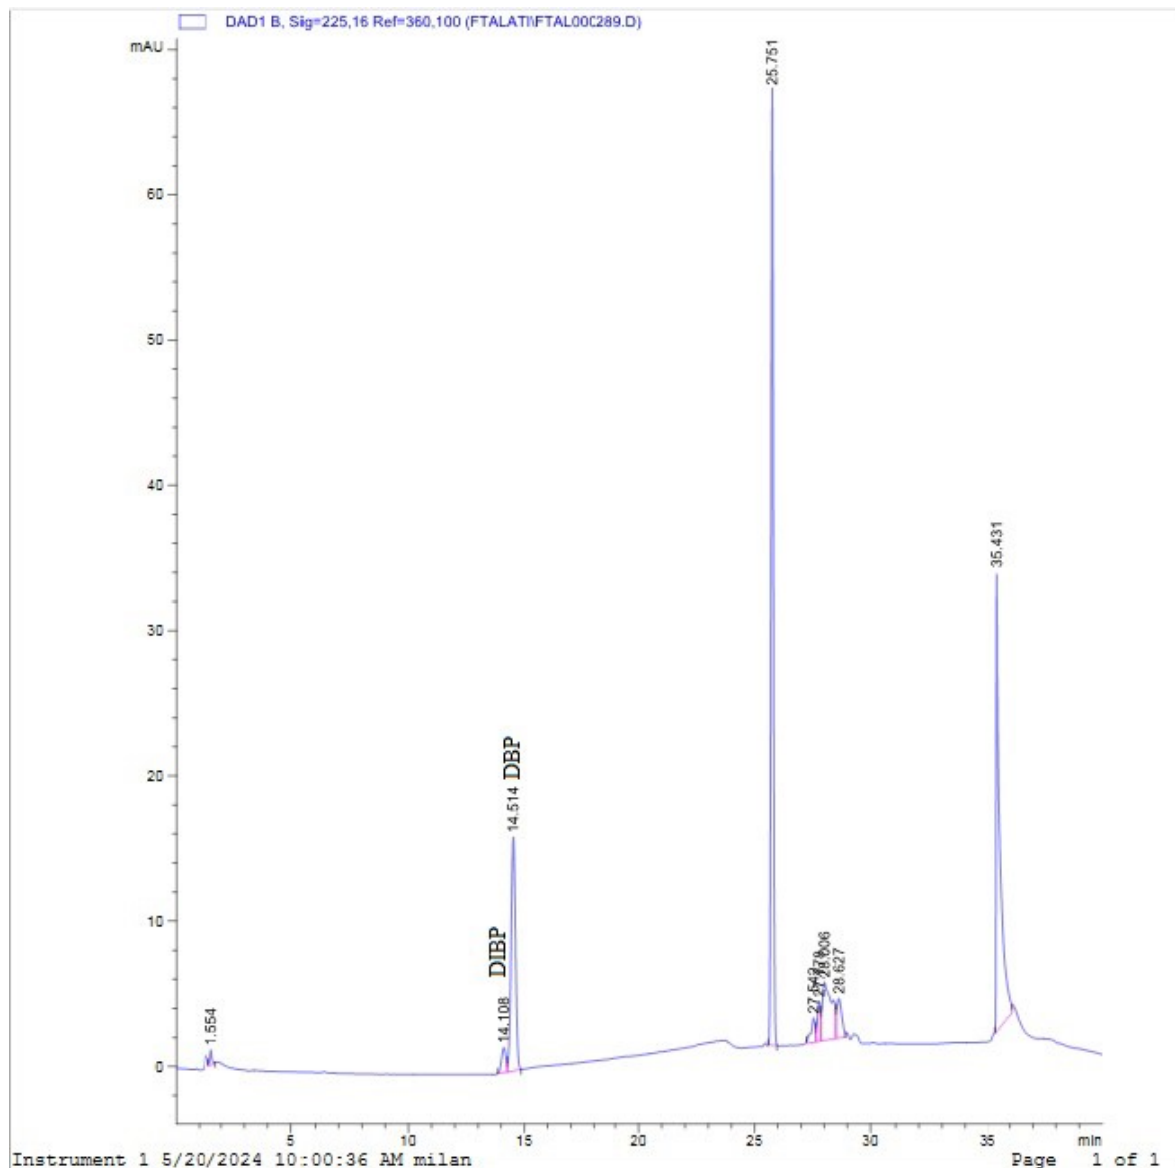

Supplement: d4ay01092b4.pdf [file d4ay01092b4.pdf]

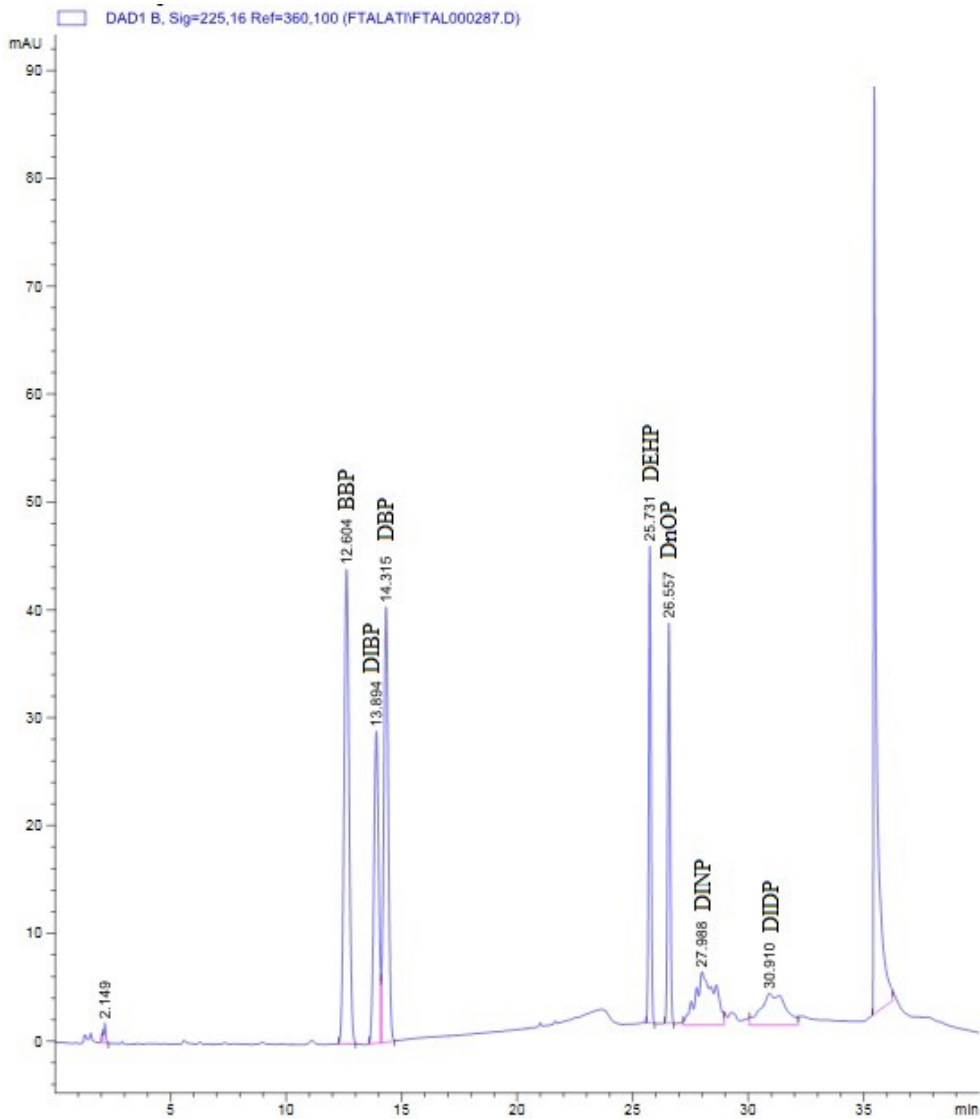

Supplement: d4ay01092b5.pdf [file d4ay01092b5.pdf]

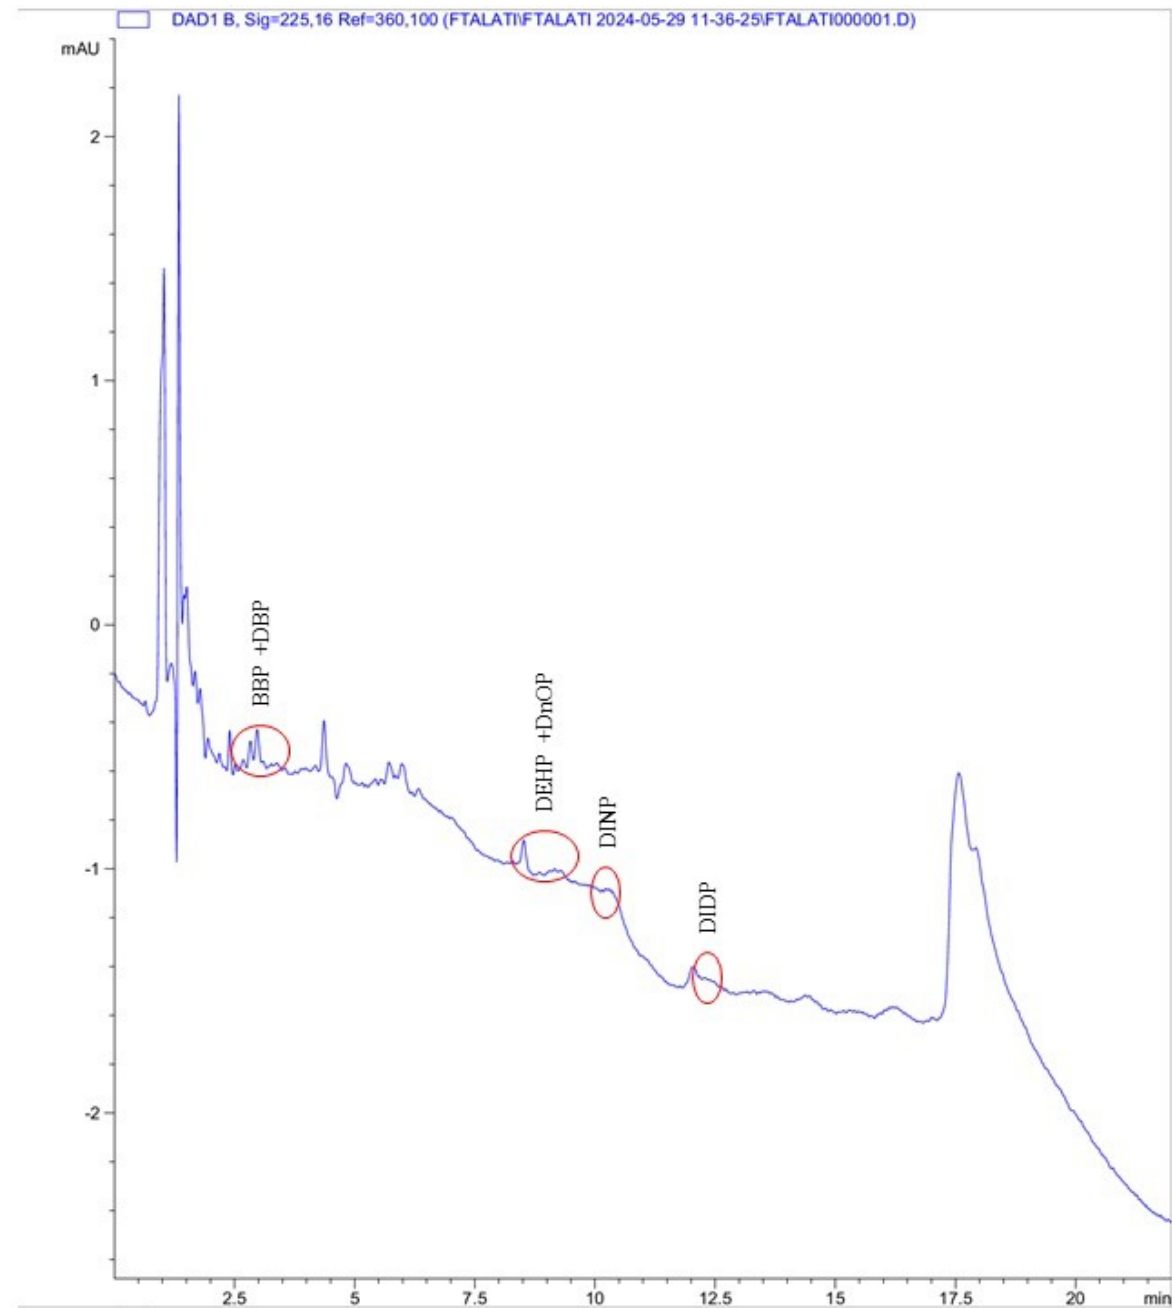

Supplement: d4ay01092b6.pdf [file d4ay01092b6.pdf]

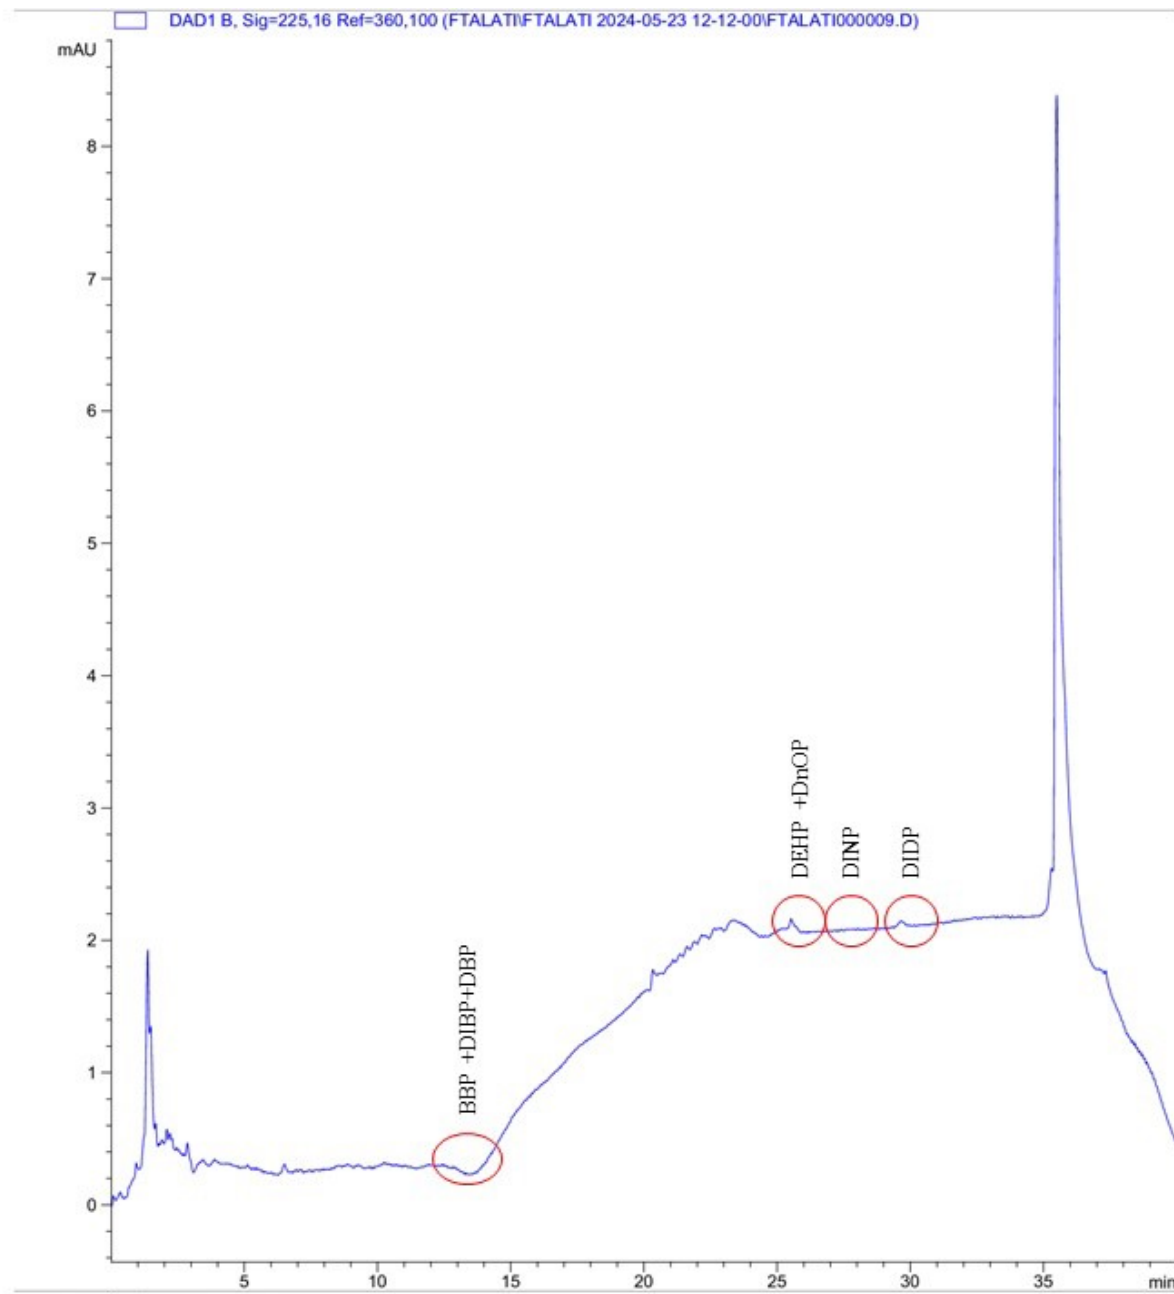

Supplement: d4ay01092b7.pdf [file d4ay01092b7.pdf]

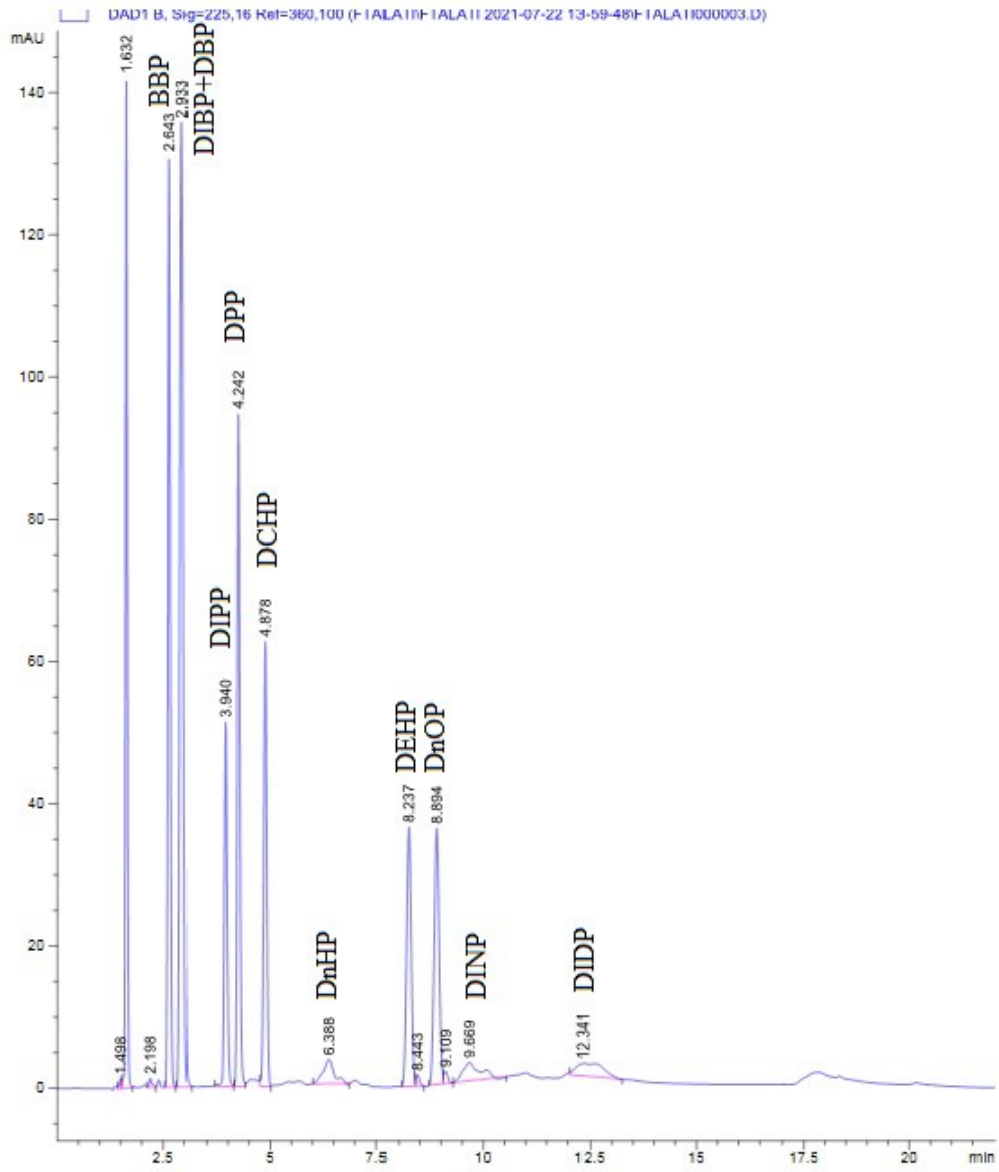

Supplement: d4ay01092b8.pdf [file d4ay01092b8.pdf]

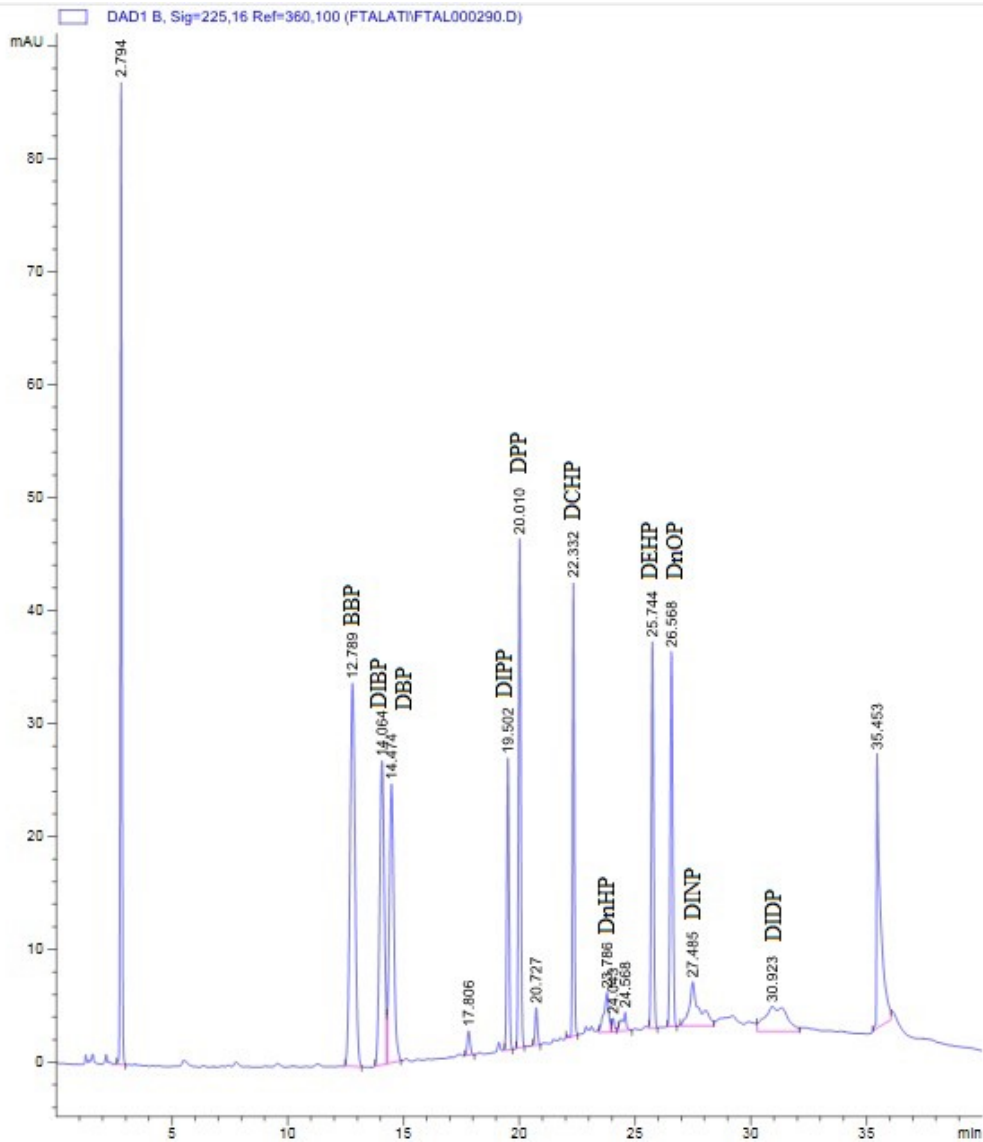

Supplement: d4ay01092b9.pdf [file d4ay01092b9.pdf]
